# Supplementary material for: Sargassum blooms in the Caribbean alter the trophic structure of the sea urchin Diadema antillarum
Source: PeerJ. 2019 Aug 30;7:e7589. doi: 10.7717/peerj.7589 (PMC6718159; doi:10.7717/peerj.7589)
Supplement: Data S1 [file peerj-07-7589-s002.xlsx]

## Sheet: GENERAL
Site	section	Dissolved Oxygen (mgl-1)	Section description
Mahahual	a	2	decomposing Sargassum
Mahahual	a	1.7	decomposing Sargassum
Mahahual	a	1.9	decomposing Sargassum
Mahahual	a	2.05	decomposing Sargassum
Mahahual	a	1.46	decomposing Sargassum
Xahuayxol	a	1.26	decomposing Sargassum
Xahuayxol	a	1.95	decomposing Sargassum
Xahuayxol	a	1.58	decomposing Sargassum
Xahuayxol	a	3.15	decomposing Sargassum
Xahuayxol	a	2.3	decomposing Sargassum
Xahuayxol	a	0.67	decomposing Sargassum
Xcalak	a	1.11	decomposing Sargassum
Xcalak	a	0.9	decomposing Sargassum
Xcalak	a	1.05	decomposing Sargassum
Xcalak	a	1.07	decomposing Sargassum
Xcalak	a	0.8	decomposing Sargassum
Mahahual	b	4.89	leachetes (dark-brown water)
Mahahual	b	3.36	leachetes (dark-brown water)
Mahahual	b	3	leachetes (dark-brown water)
Mahahual	b	1.73	leachetes (dark-brown water)
Xahuayxol	b	1.97	leachetes (dark-brown water)
Xahuayxol	b	2.81	leachetes (dark-brown water)
Xahuayxol	b	2.41	leachetes (dark-brown water)
Xahuayxol	b	4.1	leachetes (dark-brown water)
Xahuayxol	b	4.9	leachetes (dark-brown water)
Xahuayxol	b	2.2	leachetes (dark-brown water)
Xahuayxol	b	4.07	leachetes (dark-brown water)
Xahuayxol	b	1.96	leachetes (dark-brown water)
Xahuayxol	b	1.62	leachetes (dark-brown water)
Xahuayxol	b	1.48	leachetes (dark-brown water)
Xcalak	b	5.39	leachetes (dark-brown water)
Xcalak	b	4.88	leachetes (dark-brown water)
Xcalak	b	1.36	leachetes (dark-brown water)
Xcalak	b	3.4	leachetes (dark-brown water)
Xcalak	b	7.05	leachetes (dark-brown water)
Xcalak	b	2.53	leachetes (dark-brown water)
Xcalak	b	2.13	leachetes (dark-brown water)
Xcalak	b	1.09	leachetes (dark-brown water)
Mahahual	c	4.92	back reef without visible leachetes
Mahahual	c	3.4	back reef without visible leachetes
Mahahual	c	5.6	back reef without visible leachetes
Mahahual	c	3.51	back reef without visible leachetes
Mahahual	c	6.15	back reef without visible leachetes
Mahahual	c	6.05	back reef without visible leachetes
Xahuayxol	c	2.13	back reef without visible leachetes
Xahuayxol	c	3.51	back reef without visible leachetes
Xahuayxol	c	4.53	back reef without visible leachetes
Xahuayxol	c	5.11	back reef without visible leachetes
Xahuayxol	c	5.71	back reef without visible leachetes
Xahuayxol	c	4.96	back reef without visible leachetes
Xcalak	c	5.01	back reef without visible leachetes
Xcalak	c	4.3	back reef without visible leachetes
Xcalak	c	6.31	back reef without visible leachetes
Xcalak	c	5.06	back reef without visible leachetes
Xcalak	c	5.4	back reef without visible leachetes
Xcalak	c	3.54	back reef without visible leachetes
Xcalak	c	3.31	back reef without visible leachetes
