# Supplementary material for: Sargassum blooms in the Caribbean alter the trophic structure of the sea urchin Diadema antillarum
Source: PeerJ. 2019 Aug 30;7:e7589. doi: 10.7717/peerj.7589 (PMC6718159; doi:10.7717/peerj.7589)
Supplement: Data S3 — Raw data of δ13C and δ15N of algal genus considered in the mixing model analysis taken from Mahahual, Xahayxol and Xcalak, the asterisks represent the sources under Sargassum effect. [file peerj-07-7589-s004.xlsx]

## Sheet: Hoja1
Genus/Species	d15N	d13C	EFECT (WSE=O, USE=1)
Caulerpa	2.221	-9.781	0
Caulerpa	2.112	-9.98765	0
Caulerpa	5.678	-8.725	0
Caulerpa	5.689	-8.9932	0
Caulerpa	1.0762	-12.6321	0
Caulerpa	0.928371	-12.573	0
Caulerpa	0.872898	-16.6038	1
Caulerpa	0.98764	-15.8325	1
Caulerpa	2.07621	-9.61321	1
Caulerpa	1.96786	-9.64567	1
Codium	1.301	-12.122	0
Codium	1.202	-12.226	0
Dictyota	0.594	-17.247	0
Dictyota	2.529	-15.505	0
Dictyota	2	-16.342	0
Dictyota	2.575	-15.067	0
Dictyota	0.694	-15.948	0
Dictyota	0.6487	-14.987	0
Dictyota	0.843676	-15.9226	1
Dictyota	0.789376	-15.9853	1
Dictyota	0.720527	-15.6416	1
Dictyota	0.69834	-16.982	1
Dictyota	0.0859986	-15.5495	1
Dictyota	-0.00166652	-15.8296	1
Halimeda	0.6	-7.897	1
Halimeda	0.766	-8.876	1
Halimeda	-0.018	-6.128	0
Halimeda	0.6	-7.897	0
Halimeda	0.892727	-11.4036	1
Halimeda	0.8759	-13.8047	1
Halimeda	-1.263	-4.54	0
Laurencia	1.019	-17.177	0
Laurencia	3.108	-15.468	0
Laurencia	3.693	-15.836	0
Laurencia	0.857	-14.653	0
Laurencia	1.868	-14.973	0
Lobophora	1.003	-14.521	0
Lobophora	0.53	-13.768	0
Lobophora	0.784189	-9.53619	1
Lobophora	-0.123	-11.448	1
Padina	0.112	-10.059	0
Padina	0.38	-10.309	0
Penicillus	2.056	-5.649	0
Penicillus	1.629	-17.363	0
Penicillus	0.113	-14.556	0
Penicillus	-0.001	-14.448	0
Penicillus	2.01254	-9.65322	1
Penicillus	1.95554	-9.84567	1
Sargassum benthic	3.379	-13.363	0
Sargassum benthic	3.049	-15.941	0
Sargassum benthic	0.307249	-14.1362	1
Sargassum benthic	0.425992	-15.3734	1
Sargassum fluitans	-0.48	-15.24	1
Sargassum fluitans	-0.3	-15.7	1
Sargassum fluitans	-0.81	-17.14	1
Sargassum fluitans	-2.01	-16.46	1
Sargassum fluitans	-1.47	-16.25	1
Sargassum fluitans	-2.87	-16.38	1
Sargassum fluitans	-2.14	-16.14	1
Sargassum natans	-1.1	-17.95	1
Sargassum natans	-2.09	-16.94	1
Sargassum natans	-1.96	-17.66	1
Sargassum natans	-1.38	-16.3	1
Sargassum natans	-1.14	-16.5	1
Sargassum natans	-2	-16.71	1
Sargassum natans	-1.23	-17.85	1
Stypopodium	0.631	-10.961	0
Stypopodium	0.705	-11.693	0
Stypopodium	1.87	-15.813	0
Stypopodium	1.074	-17.793	0
Stypopodium	-0.16343	-17.1129	1
Stypopodium	-0.190888	-17.9891	1
Turf	3.04	-13.438	0
Turf	3.012	-13.4417	0
Turf	-0.493417	-16.3804	1
Turf	-0.51983	-16.6938	1
Turf	-0.971043	-18.5375	1
Turf	-0.816024	-18.5869	1
Turf	2.056	-15.491	0
Turf	1.629	-17.363	0
Turf	5.037	-17.779	0
Turf	4.13726	-17.0953	0
Turf	0.39899	-21.9814	1
Turf	0.417679	-21.9833	1
Turf bloom	-1.17054	-17.9281	1
Turf bloom	-1.09765	-18.6543	1
Turf bloom	-0.421207	-15.3725	1
Turf bloom	-0.523209	-16.4837	1
Turf bloom	-0.968071	-15.8256	1
Turf bloom	-0.954889	-16.7155	1
Udotea	2.17	-13.15	0
Udotea	2.215	-12.561	0
Udotea	1.626	-10.669	0
Udotea	3.206	-12.566	0
Udotea	2.107	-12.51	1
Udotea	3.2	-12.79	1
