# Supplementary material for: Sargassum blooms in the Caribbean alter the trophic structure of the sea urchin Diadema antillarum
Source: PeerJ. 2019 Aug 30;7:e7589. doi: 10.7717/peerj.7589 (PMC6718159; doi:10.7717/peerj.7589)
Supplement: Data S4 [file peerj-07-7589-s005.xlsx]

## Sheet: Hoja1
Species	site	d15N	d13C	N%	C%	C/N	Without Sargassum effect WSE=O, Under Sargassum effect USE=1
Diadema antillarum	Mahahual	4.71714	-9.46247	10.7759	37.5785	3.48728	0
Diadema antillarum	Mahahual	5.688	-10.6433	10.8838	38.0483	3.49587	0
Diadema antillarum	Mahahual	5.62455	-10.718	10.8935	37.9023	3.47934	0
Diadema antillarum	Mahahual	5.21264	-11.0631	10.8723	37.2752	3.42847	0
Diadema antillarum	Mahahual	4.85914	-10.4253	10.6994	37.0533	3.46311	0
Diadema antillarum	Mahahual	6.13176	-13.6031	10.8633	36.5075	3.36063	1
Diadema antillarum	Mahahual	5.80719	-11.4856	11.2688	38.1952	3.38946	1
Diadema antillarum	Mahahual	5.97731	-11.7507	12.0846	40.1982	3.32639	1
Diadema antillarum	Mahahual	5.34382	-11.8637	11.5876	37.4167	3.22904	1
Diadema antillarum	Mahahual	5.53272	-11.7327	12.6823	41.0201	3.23444	1
Diadema antillarum	Mahahual	5.98774	-13.4831	12.2688	39.5586	3.22433	1
Diadema antillarum	Xahuayxol	5.01286	-11.4941	11.4912	36.8578	3.2075	0
Diadema antillarum	Xahuayxol	4.75138	-10.5212	11.1163	37.9029	3.40966	0
Diadema antillarum	Xahuayxol	4.7685	-12.47	10.6604	38.5507	3.61626	0
Diadema antillarum	Xahuayxol	6.15933	-11.698	12.2931	41.8908	3.40766	0
Diadema antillarum	Xahuayxol	4.68692	-11.3215	10.6796	35.9691	3.36803	0
Diadema antillarum	Xahuayxol	4.80739	-9.40816	12.3955	39.3161	3.1718	1
Diadema antillarum	Xahuayxol	5.2739	-11.7977	12.1967	39.4486	3.23437	1
Diadema antillarum	Xahuayxol	4.99838	-9.71923	12.6159	40.7807	3.23247	1
Diadema antillarum	Xahuayxol	5.94808	-12.4008	11.1758	37.8901	3.39036	1
Diadema antillarum	Xahuayxol	4.69259	-10.8395	12.7294	41.8017	3.28388	1
Diadema antillarum	Xahuayxol	4.76356	-10.6925	12.8437	42.253	3.2898	1
Diadema antillarum	Xahuayxol	3.83264	-13.6171	11.5494	39.517	3.42157	1
Diadema antillarum	Xcalak	5.61448	-8.83068	11.5611	39.6569	3.4302	0
Diadema antillarum	Xcalak	5.68296	-9.53009	10.9449	37.6383	3.43887	0
Diadema antillarum	Xcalak	5.5611	-13.4238	11.6829	39.6576	3.3945	0
Diadema antillarum	Xcalak	4.89036	-10.5262	11.2138	38.4313	3.42714	0
Diadema antillarum	Xcalak	5.55838	-10.56	11.491	37.9885	3.30593	0
Diadema antillarum	Xcalak	4.08937	-12.7869	12.0445	39.1325	3.24899	1
Diadema antillarum	Xcalak	4.23966	-12.6729	11.6468	38.055	3.26742	1
Diadema antillarum	Xcalak	4.38994	-12.0067	11.8514	39.6196	3.34303	1
Diadema antillarum	Xcalak	4.94307	-10.3114	11.8544	39.1654	3.30386	1
Diadema antillarum	Xcalak	4.31689	-12.1238	11.591	37.9742	3.27617	1
Diadema antillarum	Xcalak	4.30958	-12.2038	11.8568	38.8222	3.27426	1
